# Supplementary material for: Nanobody-triggered lockdown of VSRs reveals ligand reloading in the Golgi
Source: PubMed Central journal article supplement (PMC5811495; doi:10.1038/s41467-018-02909-6), 2018-02-13
Supplement: 41467_2018_2909_MOESM1_ESM.pdf [file 41467_2018_2909_MOESM1_ESM.pdf]

## Supplementary information

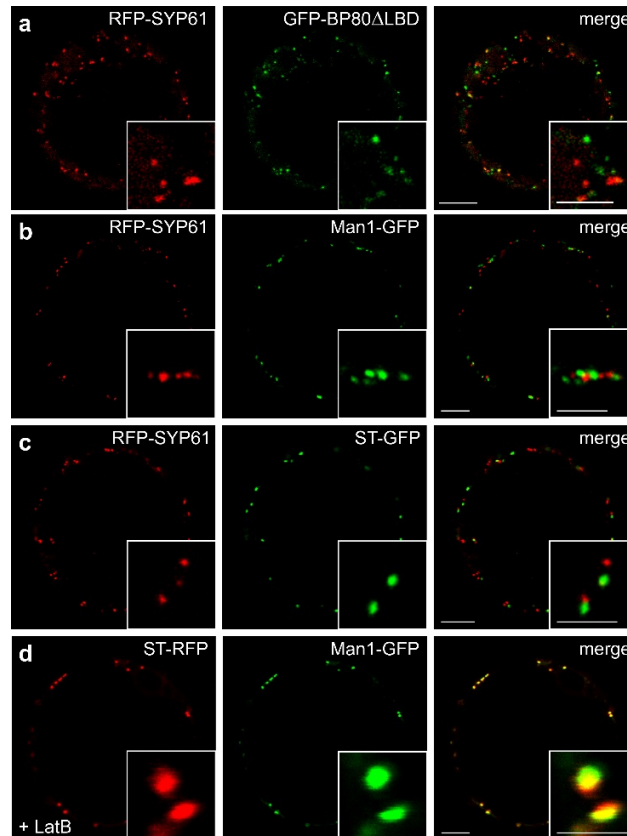

### Supplementary Figure 1. Membrane marker proteins to discriminate punctate signals in the MVB/LE, the TGN/EE and the *cis-/trans*-Golgi in colocalization experiments.

Comparison of signals for TGN/EE, MVB/LE and *cis-/trans*-Golgi in coexpression experiments. Coexpression of: (a) RFP-SYP61 with GFP-BP80 $\Delta$ LBD to discriminate TGN/EE from MVB/LE, (b) RFP-SYP61 with Man1-GFP to discriminate TGN/EE from the *trans*-Golgi, (c) RFP-SYP61 with ST-GFP to discriminate TGN/EE from the *cis*-Golgi and (d) ST-RFP with Man1-GFP to discriminate between *trans*- and *cis*-Golgi. Performed in the presence of 4  $\mu$ M latrunculin B (LatB) to avoid Golgi movement during image acquisition. Scale bars 10 $\mu$ m, insets 5 $\mu$ m, showing magnifications.

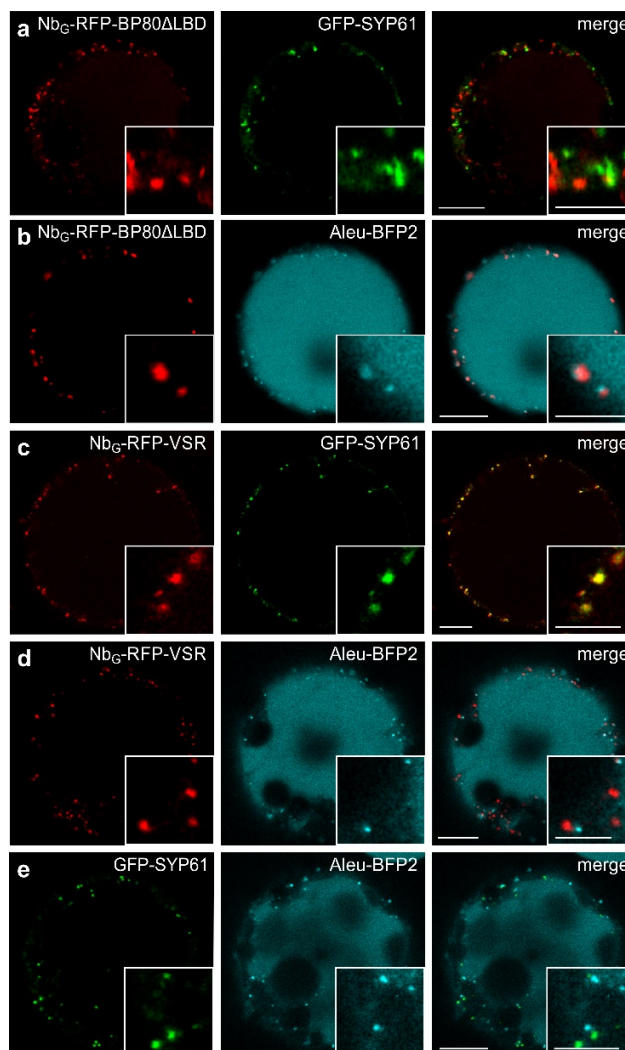

**Supplementary Figure 2. Differential localization of the fluorescent full-length VSR Nb<sub>G</sub>-RFP-VSR and the LBD-lacking MVB/LE marker Nb<sub>G</sub>-RFP-BP80ΔLBD.**

(a) Coexpression of Nb<sub>G</sub>-RFP-BP80ΔLBD with the N-terminal GFP fusion of SYP61, GFP-SYP61, as marker for the TGN/EE, and (b) with the MVB/LE and vacuolar marker Aleu- blue fluorescent protein (BFP)2 confirms the unaltered MVB/LE localization of the marker Nb<sub>G</sub>-RFP-BP80ΔLBD. (c) In sharp contrast, coexpression of Nb<sub>G</sub>-RFP-VSR with GFP-SYP61, and with (d) Aleu-BFP2 confirms the unaltered TGN/EE localization of the receptor Nb<sub>G</sub>-RFP-VSR. (e) GFP-SYP61-labeled TGN/EE are clearly distinguishable from Aleu-BFP2-labeled MVB/LE in coexpression experiments (compare to **Supplementary Fig. 1a**).

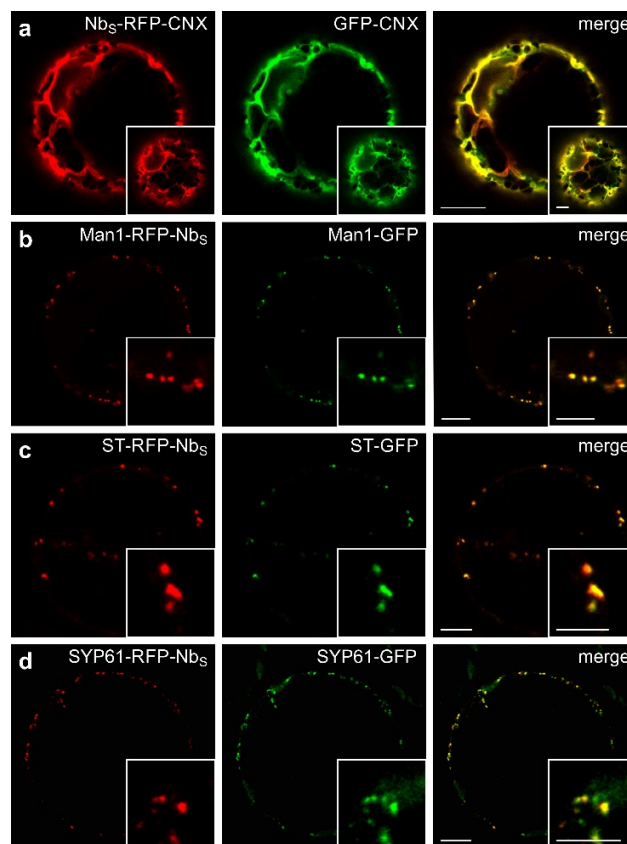

**Supplementary Figure 3. Fusion of the Nb<sub>S</sub> to compartment-specific marker proteins does not alter their compartment-specific localization.**

The localization of red fluorescent Nb<sub>S</sub>-tagged marker proteins is compared to their GFP-tagged counterparts. Colocalization of (a) Nb<sub>S</sub>-RFP-CNX with GFP-CNX in the ER, (b) Man1-RFP-Nb<sub>S</sub> with Man1-GFP in the *cis*-Golgi, (c) ST-RFP-Nb<sub>S</sub> with ST-GFP in the *trans*-Golgi and (d) SYP61-RFP-Nb<sub>S</sub> with Syp61-GFP in the TGN/EE. Scale bars 10µm, insets 5µm, showing magnifications.

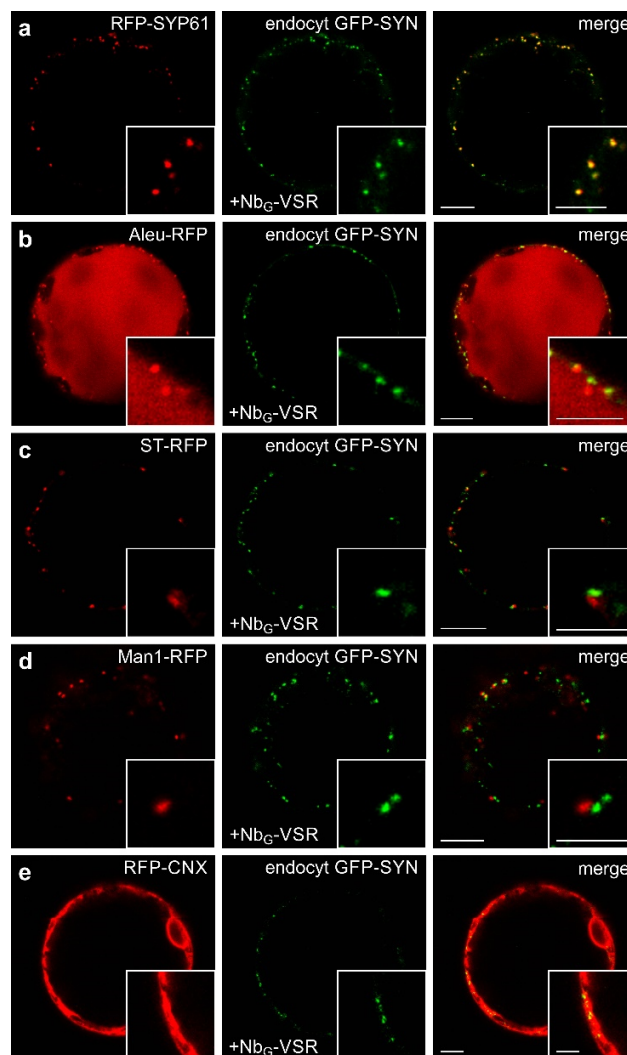

**Supplementary Figure 4. The GFP-SYN labeled Nb<sub>G</sub>-VSR localizes to the TGN/EE under steady state conditions.**

Colocalization of post-translationally GFP-SYN labeled non fluorescent Nb<sub>G</sub>-tagged VSRs with red fluorescent compartmental markers for (a) the TGN/EE, (b) the MVB/LE and the vacuole, (c) the *trans*-Golgi, (d) the *cis*-Golgi and (e) the ER. Scale bars 10µm, insets 5µm, showing magnifications.

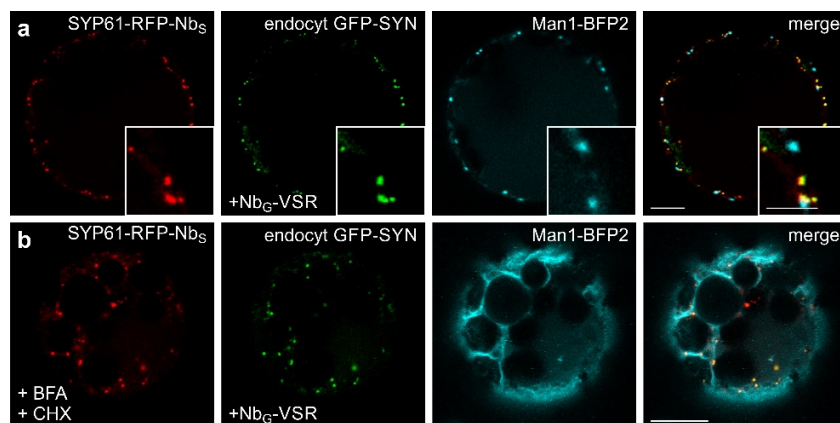

**Supplementary Figure 5. The TGN/EE-locked VSR does not colocalize with the coexpressed marker for the *cis*-Golgi.**

(a,b) Colocalization of post-translationally GFP-SYN labeled non fluorescent Nb<sub>G</sub>-tagged VSRs with the TGN/EE membrane anchor SYP61-RFP-Nb<sub>S</sub> and the marker for the *cis*-Golgi Man1-BFP2 upon GFP-SYN-triggered lockdown. (a) The overlapping signals of the labeled VSR and the TGN/EE membrane anchor (yellow) do not colocalize with the signals of the Golgi marker (cyan). (b) The colocalizing signals of TGN/EE anchored and the locked VSR persist after BFA treatment, whilst the Golgi signal redistributes to the ER, due to the BFA-triggered fusion of these compartments. Cells were treated with 20 μM BFA and 50 μM cycloheximide (CHX) for 1 h prior to imaging analysis. Scale bars 10μm, insets 5μm, showing magnifications.

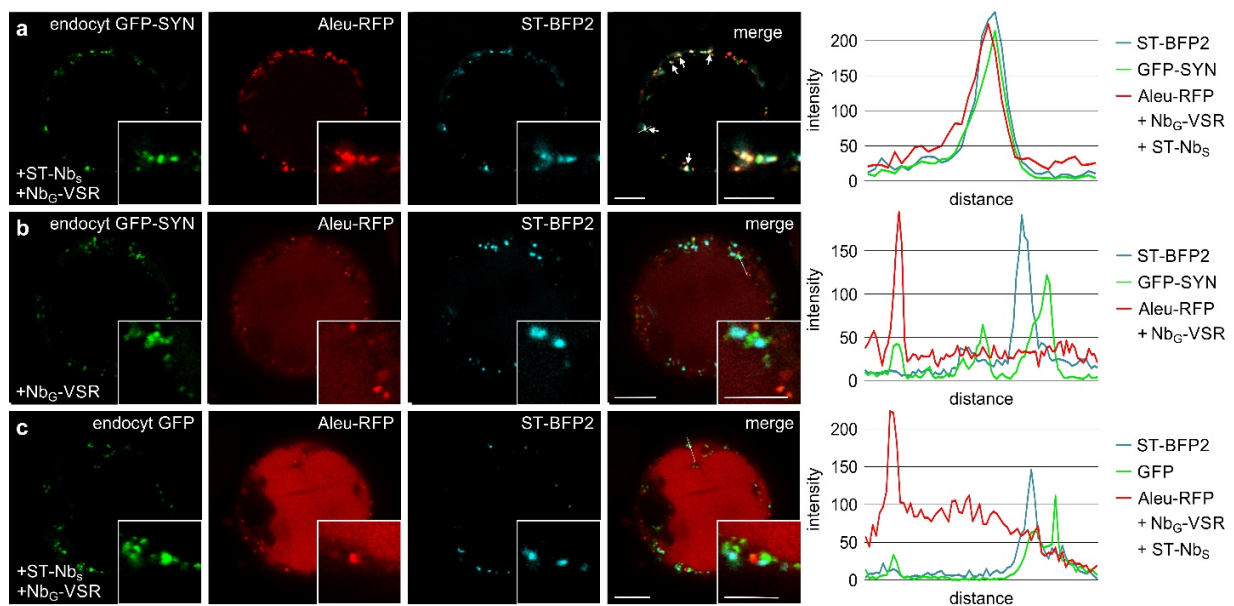

**Supplementary Figure 6. VSRs bind ligands in the *trans*-Golgi after recycling.**

(a) GFP-SYN labeled Nb<sub>G</sub>-VSRs are locked after recycling in the *trans*-Golgi and colocalize with the *trans*-Golgi marker ST-BFP2 and bind the ligand Aleu-RFP, as shown by the overlapping signal peaks in the line intensity plot (compare to Figure 5b). (b,c) Not locked VSRs (compare to Figure 5c,d) do not localize to the Golgi and thus do not bind the ligand Aleu-RFP as judged by the separated peaks in the line intensity plots. Scale bars 10μm, insets 5μm, showing magnifications.

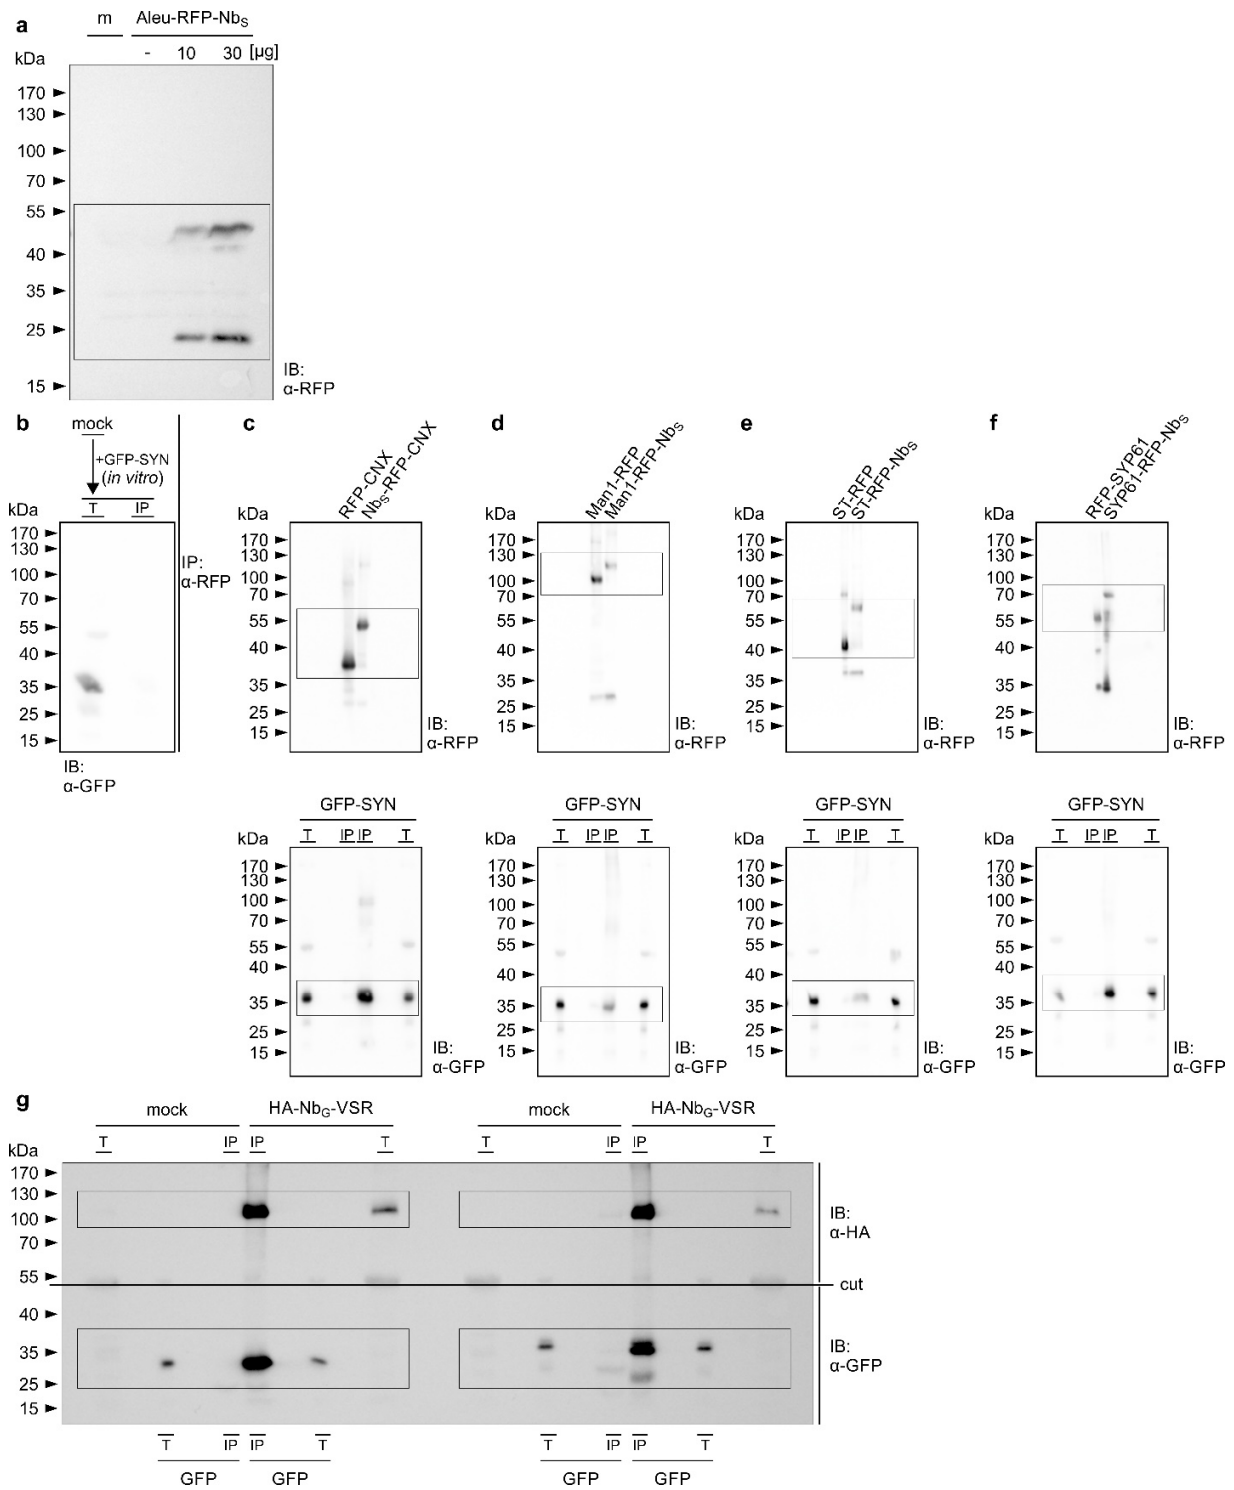

**Supplementary Figure 7. Uncropped immunoblots.**

(a) Detection of Aleu-RFP-Nb<sub>S</sub> as illustrated in Figure 3f. Section shown in Figure 3f is highlighted with a black rectangle. The immunoblot (IB) was probed with α-RFP. (b-f) Detection

of the markers/anchors and the dual epitope GFP-SYN as shown in Figure **3g-j**. **(b)** Control using mock transfected protoplasts for the immunoprecipitation (IP,  $\alpha$ -RFP). Beads were incubated with GFP-SYN and immunoblotted (IB). The total extract (T) and the immunoprecipitate (IP) was probed with  $\alpha$ -GFP to detect GFP-SYN. **(c-f)** Sections shown in Figure **3g-j** are highlighted with black rectangles. The immunoblots (IB) were probed to detect markers/anchors ( $\alpha$ -RFP) and GFP-SYN ( $\alpha$ -GFP). **(g)** Detection of VSRs and epitopes (GFP/GFP-SYN) as shown in Figure **3k**. Sections shown in Figure **3k** are highlighted with black rectangles. The immunoblots (IB) are probed to detect VSRs ( $\alpha$ -HA) and GFP/GFP-SYN ( $\alpha$ -GFP).



**Supplementary Table 1. Genetic constructs used in this study.**

|                                             | Primers                                                             | Sequence (5'-3' direction)                                                    | Template                                                         | Recipient Vector                                                                             |
|---------------------------------------------|---------------------------------------------------------------------|-------------------------------------------------------------------------------|------------------------------------------------------------------|----------------------------------------------------------------------------------------------|
| <b>Nb<sub>6</sub>-RFP-CNX (pDV01)</b>       | Nb <sub>6</sub> _NheI_S                                             | GCTCAGGCTAGCGCTAT<br>GGACTATAAAGACGACGA<br>CGACAAAATGGGATCTG<br>GAGGAATGGCTCA | pBL14 <sup>1</sup>                                               | pFF04 <sup>1</sup> ;<br>cut <i>NotI/NheI</i> to keep the N-terminal signal peptide of pFF04  |
|                                             | Nb <sub>6</sub> _NcoI_AS                                            | GGCCATCCATGGATGAT<br>GATGATGATGATGAG                                          |                                                                  |                                                                                              |
|                                             | RFP_NcoI_S                                                          | CATCATCCATGGATGGCC<br>TCCTCCGAGGACGT                                          | pFK12 <sup>2</sup>                                               |                                                                                              |
|                                             | RFP_NotI_AS                                                         | GTCACTGCGGCCGCGTG<br>CTCCAGTACTGTGGCGG<br>C                                   |                                                                  |                                                                                              |
| <b>Man1-RFP-Nb<sub>6</sub> (pSF65)</b>      | RFP_NotI_S                                                          | GAGGATGCGGCCGCGATG<br>GCCTCCTCCGAGGACGT                                       | pFK12 <sup>2</sup>                                               | pSF06 <sup>1</sup> ;<br>cut <i>BamHI/NotI</i>                                                |
|                                             | RFP_ClaI_AS                                                         | CATCATATCGATTGCTCC<br>AGTACTGTGGCGGC                                          |                                                                  |                                                                                              |
|                                             | FLAG_ClaI_S                                                         | GAGGACATCGATATGGA<br>CTATAAAGACGACGA                                          | pDV01 (see above)                                                |                                                                                              |
|                                             | Nb <sub>6</sub> _BamHI_AS                                           | GCATGAGGATCCCTAATG<br>ATGATGATGATGATGAG                                       |                                                                  |                                                                                              |
| <b>ST-RFP-Nb<sub>6</sub> (pSF128)</b>       | PLUS: ST ( <i>NheI/NotI</i> ), subcloned from pSF83 <sup>1</sup>    |                                                                               |                                                                  | pSF65 (see above);<br>cut <i>NotI/NheI</i>                                                   |
| <b>Syp61-RFP-Nb<sub>6</sub> (pSF129)</b>    | PLUS: Syp61 ( <i>NheI/NotI</i> ), subcloned from pFF25 <sup>1</sup> |                                                                               |                                                                  | pSF65 (see above);<br>cut <i>NotI/NheI</i>                                                   |
| <b>Nb<sub>6</sub>-RFP-BP80ΔLBD (pSF130)</b> | PLUS: BP80 ( <i>NotI/BamHI</i> ), subcloned from pFF03 <sup>1</sup> |                                                                               |                                                                  | pDV01 (see above);<br>cut <i>BamHI/NotI</i>                                                  |
| <b>Sec-GFP (pFK68)</b>                      | GFP_SalI_S                                                          | CATGACGTCGACTATGAG<br>TAAAGGAGAAGAAC                                          | GFP-spo <sup>3</sup>                                             | pFF14 <sup>1</sup> ;<br>cut <i>SpeI/SalI</i> to keep the N-terminal signal peptide of pFF14  |
|                                             | GFP-GGGG_SpeI_AS                                                    | TGCTTCACTAGICTATCC<br>TCCTCCTCCTTTGTATAG<br>TTCATCCATGC                       |                                                                  |                                                                                              |
| <b>Nb<sub>6</sub>-RFP-VSR (pSF75)</b>       | Nb <sub>6</sub> _NheI_S                                             | GCTCAGGCTAGCGCTAT<br>GGACTATAAAGACGACGA<br>CGACAAAATGGGATCTG<br>GAGGAATGGCTCA | pBL14 <sup>1</sup>                                               | pFF04 <sup>1</sup> ;<br>cut <i>BamHI/NheI</i> to keep the N-terminal signal peptide of pFF04 |
|                                             | Nb <sub>6</sub> _NcoI_AS                                            | GGCCATCCATGGATGAT<br>GATGATGATGATGAG                                          |                                                                  |                                                                                              |
|                                             | RFP_NcoI_S                                                          | CATCATCCATGGATGGCC<br>TCCTCCGAGGACGT                                          | pFK12 <sup>2</sup>                                               |                                                                                              |
|                                             | RFP_NdeI_AS                                                         | TTGGCCATATGTGCTCC<br>AGTACTGTGGCGGC                                           |                                                                  |                                                                                              |
|                                             | VSR_NdeI_S                                                          | GTGGTTCATATGTTAAC<br>GAGGCTCGATTTCGT                                          | first strand cDNA<br>from 3-day-old <i>A. thaliana</i> seedlings |                                                                                              |
|                                             | VSR_BamHI_AS                                                        | CTAGTCGGATCCCTAGG<br>CACGTTTCATCATTTCGT                                       |                                                                  |                                                                                              |

|                                      |                                                                          |                                                                                                 |                                                                                                        |                                                                                                   |
|--------------------------------------|--------------------------------------------------------------------------|-------------------------------------------------------------------------------------------------|--------------------------------------------------------------------------------------------------------|---------------------------------------------------------------------------------------------------|
| <b>Nb<sub>6</sub>-VSR (pSF76)</b>    | Nb <sub>6</sub> _NheI_S                                                  | GCTCAGGCTAGCGCTAT<br>GGACTATAAAGACGACGA<br>CGACAAAATGGGATCTG<br>GAGGAATGGCTCA                   | pBL14 <sup>1</sup>                                                                                     | pSF75 (see above);<br>cut <i>NdeI/NheI</i> to keep the N-terminal signal peptide of pSF75         |
|                                      | Nb <sub>6</sub> _NdeI_AS                                                 | GTCCTCCATATGATGATG<br>ATGATGATGATGAG                                                            |                                                                                                        |                                                                                                   |
| <b>ST-RFP (pSF84)</b>                | RFP_NotI_S                                                               | TGGCCCGCGCCGCATG<br>GCCTCTCCGAGGACGT                                                            | pFK44 <sup>2</sup>                                                                                     | pSF83 <sup>1</sup> ;<br>cut <i>BamHI/NotI</i>                                                     |
|                                      | RFP_BamHI_AS                                                             | TGCTTCGGATCCTTATGC<br>TCCAGTACTGTGGC                                                            |                                                                                                        |                                                                                                   |
| <b>Amy-SYN (pSF57)</b>               | Amy_NcoI_S                                                               | CTATAACCATGGCGAACA<br>AACACTTGTCCTC                                                             | pCN1 <sup>2</sup>                                                                                      | pCN1 <sup>2</sup> ;<br>cut <i>BamHI/NcoI</i>                                                      |
|                                      | Amy_NotI_AS                                                              | ATCAACGCGCGCCGCGA<br>TCTTCTCCCATACGGCAT                                                         |                                                                                                        |                                                                                                   |
|                                      | SYN_NotI/BamHI_S                                                         | GGCCGCGTTGATCCTGA<br>TAATGAAGCATACGAAAT<br>GCCTTCTGAAGAAGGCTA<br>TCAAGATTATGAACCGGA<br>GGCTTAGG | Complementary<br>oligonucleotides to<br>assemble the coding<br>sequence of the<br>SYN-tag <sup>4</sup> |                                                                                                   |
|                                      | SYN_NotI/BamHI_AS                                                        | GATCCCTAAGCCTCCGGT<br>TCATAATCTTGATAGCCT<br>TCTTCAGAAGGCATTTTCG<br>TATGCTTCATTATCAGGA<br>TCAACG |                                                                                                        |                                                                                                   |
| <b>Aleu-RFP-Nbs (pDV02)</b>          | PLUS: P35S-Aleu ( <i>EcoRI/NheI</i> ), subcloned from pFF15 <sup>1</sup> |                                                                                                 | pCN1 <sup>2</sup> ;<br>cut <i>BamHI/EcoRI</i>                                                          |                                                                                                   |
|                                      | RFP_NcoI_S                                                               | CTAGCGCCATGGCCTCC<br>TCCGAGGAC                                                                  |                                                                                                        |                                                                                                   |
|                                      | RFP_KpnI_AS                                                              | ATACATGGTACCTGCTCC<br>AGTACTGTGGCGGC                                                            |                                                                                                        |                                                                                                   |
|                                      | PLUS: Nbs ( <i>KpnI/BamHI</i> ); chemically synthesized                  |                                                                                                 |                                                                                                        |                                                                                                   |
| <b>GFP-SYN (pSF74)</b>               | GFP_NheI_S                                                               | GCATGAGCTAGCGCCAT<br>GGTGAGCAAGGGCGAGG                                                          | pFF04 <sup>1</sup>                                                                                     | pFF04 <sup>1</sup> ;<br>cut <i>BamHI/NheI</i> to keep the N-terminal<br>signal peptide of pFF04   |
|                                      | mEGFP_HindIII_AS                                                         | GTTGGGGTCTTTGCTAAG<br>CTTGGACTGGGTGCTCA<br>G                                                    |                                                                                                        |                                                                                                   |
|                                      | mEGFP_HindIII_S                                                          | CTGAGCACCCAGTCCAA<br>GCTTAGCAAAGACCCCAA<br>C                                                    | pFF04 <sup>1</sup>                                                                                     |                                                                                                   |
|                                      | GFP_NotI_AS                                                              | ATCAACGCGCGCCGCCT<br>TGTACAGCTCGTCCATGC                                                         |                                                                                                        |                                                                                                   |
|                                      | PLUS: SYN ( <i>NotI/BamHI</i> ), subcloned from pSF57 (see above)        |                                                                                                 |                                                                                                        |                                                                                                   |
| <b>HA-Nb<sub>6</sub>-VSR (pSF88)</b> | HA_Nb <sub>6</sub> _NheI_S                                               | CTTTCTGCTAGCGCTATG<br>TATCCGTATGATGTTCCA<br>GATTATGCTATGGATCT<br>GGAGGAATGGCT                   | pBL14 <sup>1</sup>                                                                                     | pFK120 <sup>1</sup> ;<br>cut <i>BamHI/NheI</i> to keep the N-terminal<br>signal peptide of pFK120 |
|                                      | Nb <sub>6</sub> _NdeI_AS                                                 | GTCCTCCATATGATGATG<br>ATGATGATGATGAG                                                            |                                                                                                        |                                                                                                   |
|                                      | PLUS: VSR4 ( <i>NdeI/BamHI</i> ), subcloned from pSF56 (see above)       |                                                                                                 |                                                                                                        |                                                                                                   |
| <b>Nbs-RFP-CNX (pDV03)</b>           | Nbs_NheI_S                                                               | CGATACGCTAGCGCTATG<br>GACTATAAAGACGACGAC<br>GACAAAATGCAGGTGCA<br>GCTGCAGGA                      | pDV02, see above                                                                                       | pFF04 <sup>1</sup> ;<br>cut <i>NotI/NheI</i> to keep the N-terminal<br>signal peptide of pFF04    |

|                               |                                                                          |                                         |                    |                                                |
|-------------------------------|--------------------------------------------------------------------------|-----------------------------------------|--------------------|------------------------------------------------|
|                               | Nbs_ <i>NcoI</i> _AS                                                     | CGATGACCATGGGCTGC<br>TCACGGTCACCTGGG    |                    |                                                |
|                               | RFP_ <i>NcoI</i> _S                                                      | AGTCTACCATGGATGGCC<br>TCCTCCGAGGACGT    | pFK12 <sup>2</sup> |                                                |
|                               | RFP_ <i>NotI</i> _AS                                                     | AGTCTAGCGGCCGCCGG<br>GTGCTCCAGTACTGTG   |                    |                                                |
| <b>Man1-RFP-Nbs (pSF78)</b>   | RFP_ <i>NotI</i> _S                                                      | GAGGATCGGCCGCATG<br>GCCTCCTCCGAGGACGT   | pFK12 <sup>2</sup> | pFF06 <sup>1</sup> ;<br>cut <i>BamHI/NotI</i>  |
|                               | RFP_ <i>KpnI</i> _AS                                                     | TCCTTAGGTACCTGCTCC<br>AGTGCTGTGGCGGC    |                    |                                                |
|                               | PLUS: Nbs ( <i>KpnI/BamHI</i> ), subcloned from pDV02 (see above)        |                                         |                    |                                                |
| <b>ST-RFP-Nbs (pSF82)</b>     | PLUS: ST ( <i>NheI/NotI</i> ), subcloned from pSF83 <sup>1</sup>         |                                         |                    | pSF78 (see above);<br><i>NotI/NheI</i>         |
| <b>Syp61-RFP-Nbs (pSF80)</b>  | PLUS: RFP-Nbs ( <i>NotI/BamHI</i> ), subcloned from pSF78 (see above)    |                                         |                    | pFF25 <sup>1</sup> ;<br>cut <i>BamHI/NotI</i>  |
| <b>Man1-Nbs (pSF85)</b>       | HA_ <i>NotI</i> _S                                                       | CATGTAGCGGCCGTAT<br>CCTTATGATGTTCTGA    | pDV02, see above   | pSF78 (see above);<br>cut <i>BamHI/NotI</i>    |
|                               | Nbs_ <i>BamHI</i> _AS                                                    | TGCTTCGGATCCCTAGCT<br>GCTCACGGTCACCTGGG |                    |                                                |
| <b>Man1-mTagBFP2 (pSF143)</b> | PLUS: mTagBFP2 ( <i>NotI/BamHI</i> ); chemically synthesized             |                                         |                    | pFF06 <sup>1</sup> ;<br>cut <i>BamHI/NotI</i>  |
| <b>Aleu-mTagBFP2 (pFK106)</b> | PLUS: P35S-Aleu ( <i>EcoRI/NheI</i> ), subcloned from pFF15 <sup>1</sup> |                                         |                    | pDS13 <sup>5</sup> ;<br>cut <i>BamHI/EcoRI</i> |
|                               | mTagBFP2_ <i>NheI</i> _S                                                 | GAAAGCGCTAGCATGTCT<br>GAACTTATTAAGGA    | pSF143, see above  |                                                |
|                               | mTagBFP2_ <i>BamHI</i> _AS                                               | TGCTTCGGATCCCTAATT<br>CAACTTATGTCCCA    |                    |                                                |
| <b>ST-Nbs (pSF86)</b>         | HA_ <i>NotI</i> _S                                                       | CATGTAGCGGCCGTAT<br>CCTTATGATGTTCTGA    | pDV02, see above   | pSF82 (see above);<br>cut <i>BamHI/NotI</i>    |
|                               | Nbs_ <i>BamHI</i> _AS                                                    | TGCTTCGGATCCCTAGCT<br>GCTCACGGTCACCTGGG |                    |                                                |
| <b>ST-mTagBFP2 (pSF142)</b>   | PLUS: mTagBFP2 ( <i>NotI/BamHI</i> ); chemically synthesized             |                                         |                    | pSF83 <sup>1</sup> ;<br>cut <i>BamHI/NotI</i>  |

#### Established plasmids used in this study

|                                 |                                        |
|---------------------------------|----------------------------------------|
| <b>RFP-Syp61<sup>1</sup></b>    | TGN marker                             |
| <b>Aleu-RFP<sup>1</sup></b>     | MVB/LE and vacuolar marker, VSR ligand |
| <b>Man1-RFP<sup>6</sup></b>     | <i>cis</i> -Golgi marker               |
| <b>RFP-CNX<sup>1</sup></b>      | ER marker                              |
| <b>GFP-CNX<sup>1</sup></b>      | ER marker                              |
| <b>Man1-GFP<sup>1</sup></b>     | <i>cis</i> -Golgi marker               |
| <b>ST-GFP<sup>1</sup></b>       | <i>trans</i> -Golgi marker             |
| <b>GFP-Syp61<sup>1</sup></b>    | TGN marker                             |
| <b>GFP-BP80ΔLBD<sup>1</sup></b> | MBV/LE marker                          |

## Supplementary References

1. Künzl F, Frühholz S, Fäßler F, Li B, Pimpl P. Receptor-mediated sorting of soluble vacuolar proteins ends at the trans-Golgi network/early endosome. *Nat Plants* **2**, 16017 (2016).
2. Scheuring D, *et al.* Ubiquitin initiates sorting of Golgi and plasma membrane proteins into the vacuolar degradation pathway. *BMC plant biology* **12**, 164 (2012).
3. daSilva LL, *et al.* Receptor salvage from the prevacuolar compartment is essential for efficient vacuolar protein targeting. *The Plant cell* **17**, 132-148 (2005).
4. Guilliams T, *et al.* Nanobodies raised against monomeric alpha-synuclein distinguish between fibrils at different maturation stages. *Journal of molecular biology* **425**, 2397-2411 (2013).
5. Niemes S, *et al.* Retromer recycles vacuolar sorting receptors from the trans-Golgi network. *The Plant journal : for cell and molecular biology* **61**, 107-121 (2010).
6. Nebenfuhr A, *et al.* Stop-and-go movements of plant Golgi stacks are mediated by the acto-myosin system. *Plant physiology* **121**, 1127-1142 (1999).
